# Supplementary material for: Selection and Application of ssDNA Aptamers for Fluorescence Biosensing Detection of Malachite Green
Source: MDPI journal article supplement (doi:10.3390/foods11060801), 2022-03-10
Supplement: s1 [file s1]

## Supplementary data

### Selection and application of ssDNA aptamers for fluorescence biosensing detection of malachite green

Miaojia Xie<sup>1</sup>, Zanolin Chen<sup>1</sup>, Fengguang Zhao<sup>2</sup>, Ying Lin<sup>1</sup>, Suiping Zheng<sup>1</sup>, Shuangyan Han<sup>1\*</sup>

1 Guangdong Key Laboratory of Fermentation and Enzyme Engineering, School of Biology and Biological Engineering, South China University of Technology, Guangzhou, 510006, Guangdong, China

2 School of Light Industry and Engineering, South China University of Technology, Guangzhou, 510006, Guangdong, China

**Table S1.** Detail selection setting conditions in each round of Capture-SELEX

| Round | The input of ssDNA library | Beads      | Negative screening (40min) | Positive screening (40min) |
|-------|----------------------------|------------|----------------------------|----------------------------|
| 1     | 260 $\mu$ L/5 $\mu$ M      | 1 mL       | 400 $\mu$ L DPBS           | 200 $\mu$ L/100 $\mu$ M MG |
| 2     | 100 $\mu$ L/800 nM         | 80 $\mu$ L | 200 $\mu$ L DPBS           | 200 $\mu$ L/100 $\mu$ M MG |
| 3     | 100 $\mu$ L/800 nM         | 80 $\mu$ L | 200 $\mu$ L DPBS           | 200 $\mu$ L/100 $\mu$ M MG |
| 4     | 100 $\mu$ L/800 nM         | 80 $\mu$ L | 200 $\mu$ L DPBS           | 200 $\mu$ L/100 $\mu$ M MG |
| 5     | 100 $\mu$ L/800 nM         | 80 $\mu$ L | 200 $\mu$ L DPBS           | 200 $\mu$ L/100 $\mu$ M MG |
| 6     | 100 $\mu$ L/800 nM         | 80 $\mu$ L | 200 $\mu$ L DPBS           | 200 $\mu$ L/100 $\mu$ M MG |
| 7     | 100 $\mu$ L/800 nM         | 80 $\mu$ L | 200 $\mu$ L DPBS           | 200 $\mu$ L/100 $\mu$ M MG |
| 8     | 100 $\mu$ L/800 nM         | 80 $\mu$ L | 200 $\mu$ L DPBS           | 200 $\mu$ L/100 $\mu$ M MG |
| 9     | 100 $\mu$ L/800 nM         | 80 $\mu$ L | 200 $\mu$ L DPBS           | 200 $\mu$ L/100 $\mu$ M MG |

**Table S2.** 24 candidate sequences. All 24 candidate sequences were selected from the enrichment library after the high-throughput sequencing and analysis of numerous sequences. The affinity of these 24 candidate sequences with MG was tested by ITC assays. Among them, MG-12, MG-16 and MG-17 labeled red were found to have an affinity for MG. The other sequences showed no affinity for MG.

| Number | Sequence (5'-3')                      |
|--------|---------------------------------------|
| MG-1   | CCGCCACAGGACAGCCAGTCTGATCGCCATGACGAC  |
| MG-2   | AGCCCGAGCTGCAGCCAGAATGTGCCACGTGTACGT  |
| MG-3   | CGAGACACAGTCACGTGCATCCAGTCAGCATGCGTC  |
| MG-4   | TGCAACACAACAGCCAGTCATGCCGGTGCACAGTCA  |
| MG-5   | CCCCGACAGCCGGCACAATGTGTCTGCCACGGACGT  |
| MG-6   | CGCAACGCGGCAACAGAGCACAGATCGCACAGACTG  |
| MG-7   | CGAGCCGAACGAGACGTCCAGTCCGTGCCCACGCAC  |
| MG-8   | TGTGCCCACAACCTCCAGTCACGTTCGTCCAGCTCAG |
| MG-9   | TCTCGCAACAGCCAGCGTCATGTGACCACGGAACCA  |
| MG-10  | CGCGCAGCGGCAGACAGTCAGACTGCGACGCACGTT  |
| MG-11  | CATGCCCAACGACATGCAGCACGTGGCCATGCACAA  |
| MG-12  | CCATGCGACGGACAGCACGTGTACCGCGATCAGCC   |
| MG-13  | ACGCATCGCGAACAGCCGTGCCGTGTCCACGTACAG  |
| MG-14  | CACCGCCAGGGACAGCCAGTCACGTAGCCCGGAACG  |
| MG-15  | CGGCCAGACGACAGCCAGTCACCGGACACGATCAGG  |
| MG-16  | CCACCCGACAGCCAGTCACGCGCATCGTACAGACCG  |
| MG-17  | CGCAGCGCGGCAGACAGTCAGGCTCAGCACGTGGCA  |
| MG-18  | CCGCAGCACGGTCGTACAGCAGCTGCCACGGCATCC  |
| MG-19  | CGCAGACAGCCAGTCAGGGAGCGTCCAGTCCGACAC  |
| MG-20  | CGCACAGCAAGACAGCCAGTCAACAGCCGCGAATGT  |
| MG-21  | CCATGCAGCCAGCGTCCACCGTCCGTACAGTACGTG  |
| MG-22  | CGCGCACAGACAGCGTCATGGCCACGTACAGTTCCT  |
| MG-23  | CGCTACGACAGACAGCGTCGAGCACACAACGTTGCG  |
| MG-24  | ACGCACGTACGGCCAGTCATATGCGCACCGCGTTCA  |

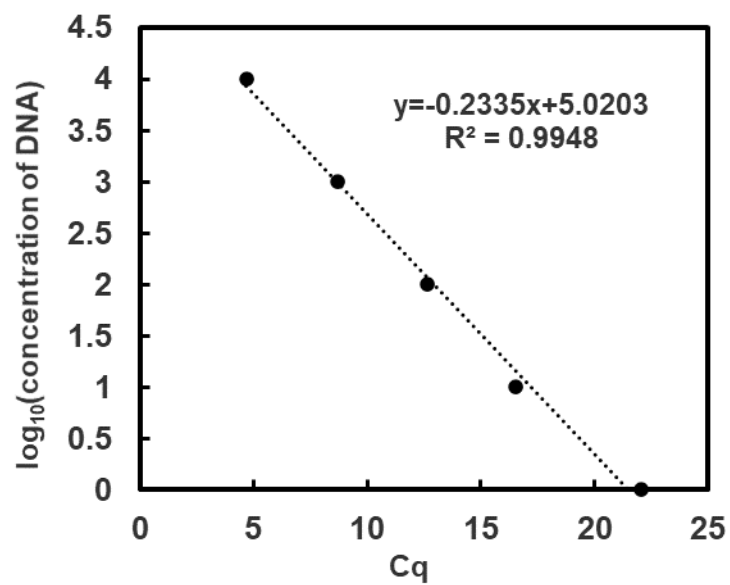

**Figure S1.** The quantitative standard curve between DNA concentration and Cq of Q-PCR.

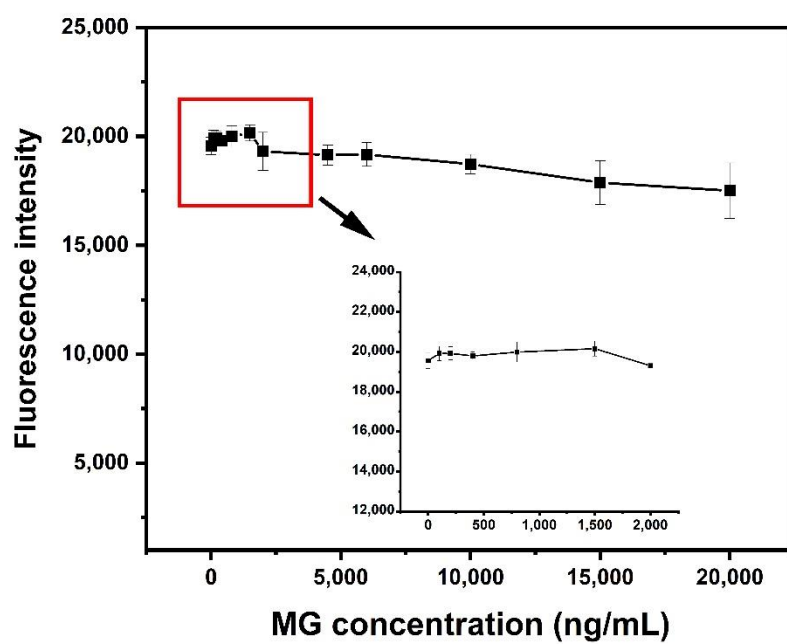

**Figure S2.** Influence of high MG concentration factor on the fluorescence intensity of FAM labels in the sensing system.

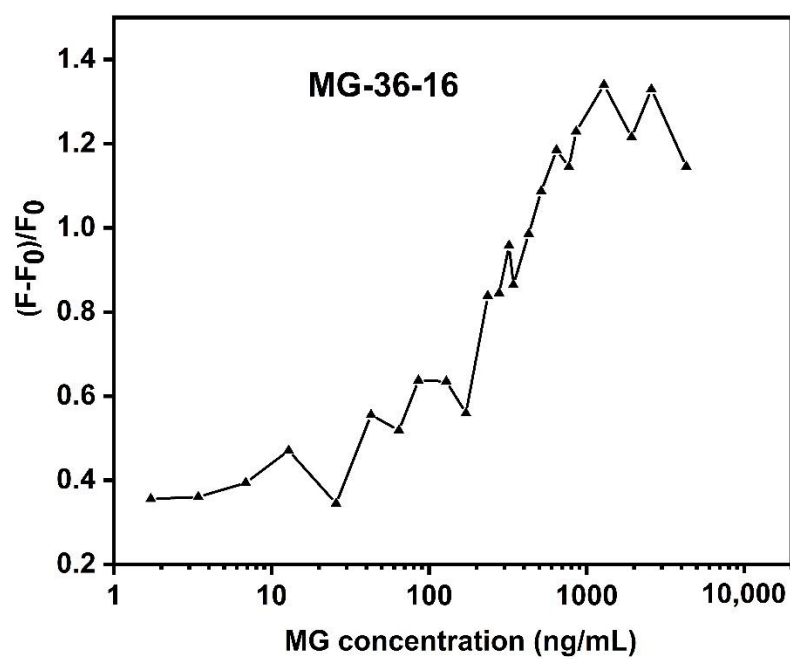

**Figure S3.** The relative fluorescence intensity of using FAM-MG-36-16 aptamer in the aptasensor after incubation with a series of concentrations of MG.

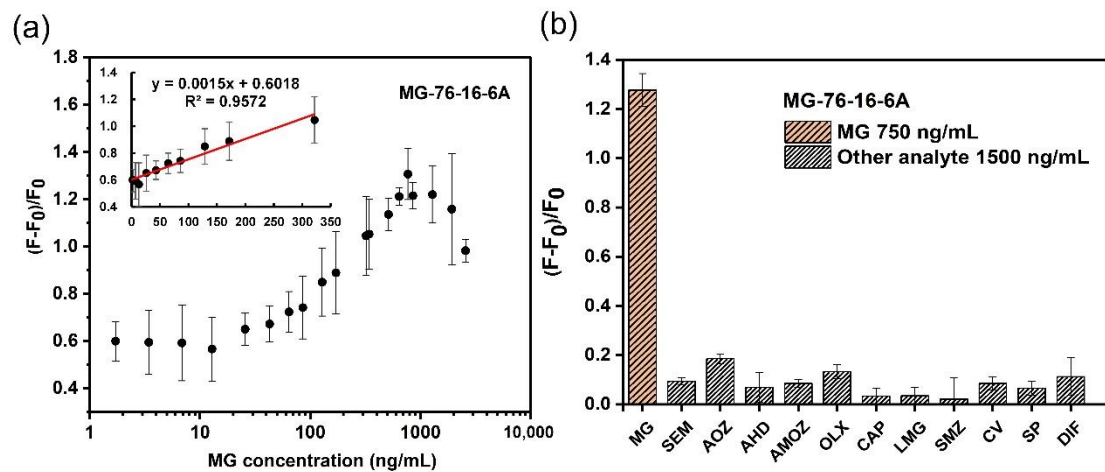

**Figure S4.** (a) The relative fluorescence intensity of FAM-MG-76-16-6A aptamer after incubation with various concentrations of MG (0-1928.57 ng/mL). The inset showed a linear response from 1.71 to 321.43 ng/mL of MG ( $R^2=0.9572$ ). (b) The specificity test using aptamer MG-76-16-6A in aptasensor. Error bars were obtained from 3 parallel experiments.
